# Supplementary material for: The Effects of Shading and Nutrient Management on Yield Quality of Vegetable Fern
Source: MDPI journal article supplement (doi:10.3390/horticulturae9020259), 2023-02-15
Supplement: s1 [file s1 › horticulturae-2212476-supplementary.pdf]

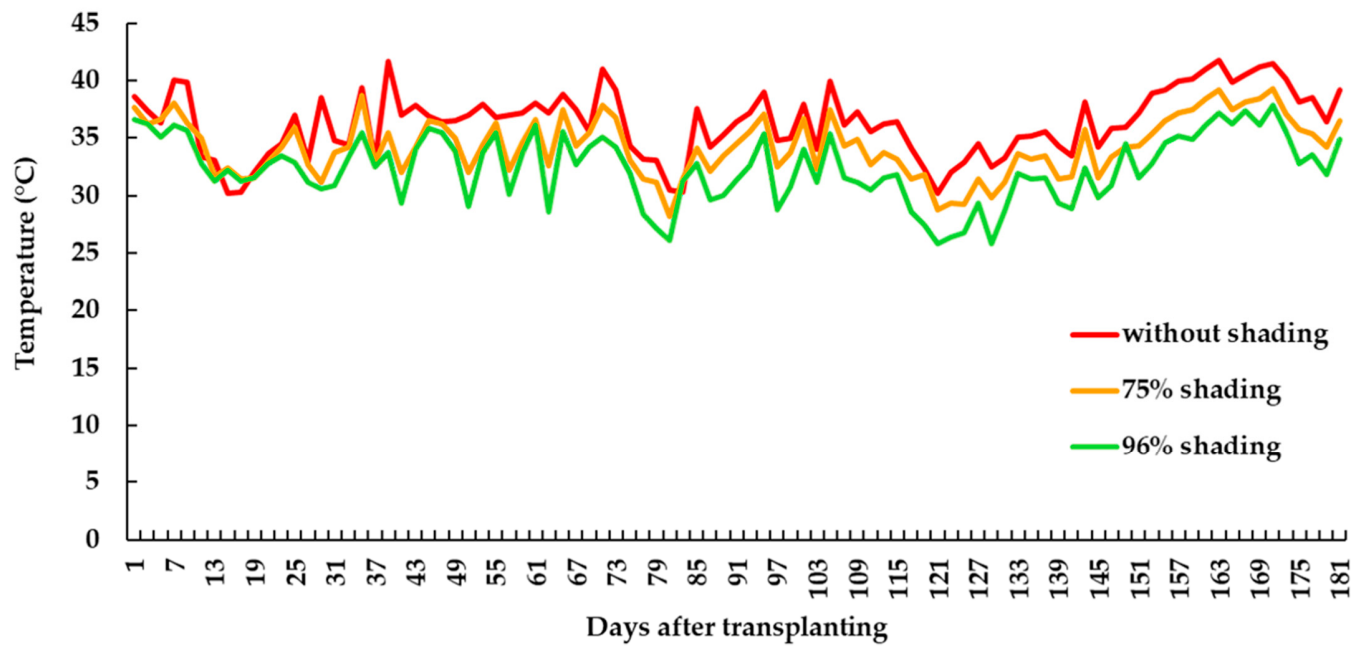

**Figure S1.** The temperature of the microenvironment in the study area for vegetable production under different shading treatments.
